# Supplementary material for: Rational design, preparation and characterization of recombinant Ag85B variants and their glycoconjugates with T-cell antigenic activity againstMycobacterium tuberculosis
Source: Royal Society of Chemistry journal article supplement (doi:10.1039/c8ra03535k), 2018-01-01
Supplement: c8ra03535k1.pdf [file c8ra03535k1.pdf]

## Supplementary information

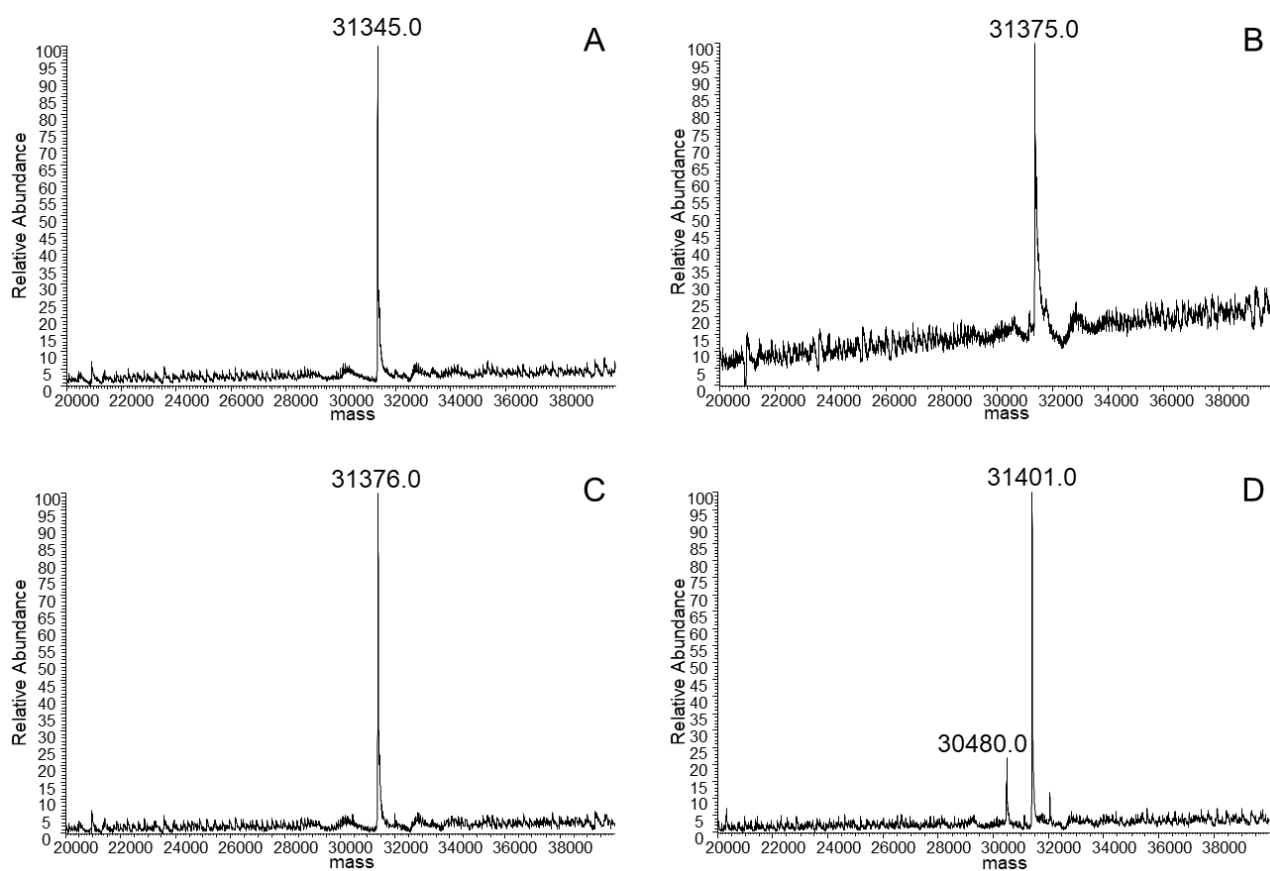

**Fig. S1** Deconvoluted ESI-MS spectra of purified rAg85B (A), rAg85B-K30R (B), rAg85B-K282R (C) and rAg85B-K30R/K282R (D).

**Table S1** Identified peptides in the mappings of rAg85B and its variants. Peptides including R30 are highlighted in yellow, those with R282 are in violet, while peptides comprising the unmodified K30 and K282 residues are in blue.

| Position  | [M+H] <sup>+</sup> | Sequence                              | rAg85B | rAg85B-K30R | rAg85B-K282R | rAg85B-K30R/K282R |
|-----------|--------------------|---------------------------------------|--------|-------------|--------------|-------------------|
| [1-8]     | 851.99             | -.AMAISDPF.S                          | ✓      | ✓           | ✓            | ✓                 |
| [1-17]    | 1851.12            | -.AMAISDPFSRPGLPVEY.L                 |        |             | ✓            | ✓                 |
| [3-8]     | 649.72             | M.AISDPF.S                            | ✓      | ✓           |              |                   |
| [3-17]    | 1648.84            | M.AISDPFSRPGLPVEY.L                   |        |             | ✓            | ✓                 |
| [9-17]    | 1018.15            | F.SRPGLPVEY.L                         | ✓      | ✓           | ✓            | ✓                 |
| [18-24]   | 727.83             | Y.LQVSPS.M                            |        | ✓           |              |                   |
| [18-30]   | 1456.70            | Y.LQVSPSMGRDIR.V                      |        | ✓           |              |                   |
| [18-33]   | 1803.12            | Y.LQVSPSMGRDIKVQF.Q                   | ✓      |             | ✓            |                   |
| [18-33]   | 1831.13            | Y.LQVSPSMGRDIRVQF.Q                   |        | ✓           |              | ✓                 |
| [18-44]   | 2878.21            | Y.LQVSPSMGRDIKVQFQSGGNNSPAVY.L        |        |             | ✓            |                   |
| [19-33]   | 1689.96            | L.QVSPSMGRDIKVQF.Q                    | ✓      |             | ✓            |                   |
| [19-44]   | 2765.06            | L.QVSPSMGRDIKVQFQSGGNNSPAVY.L         |        |             | ✓            |                   |
| [20-33]   | 1561.83            | Q.VSPSMGRDIKVQF.Q                     | ✓      |             | ✓            |                   |
| [25-33]   | 1094.31            | S.MGRDIKVQF.Q                         | ✓      |             |              |                   |
| [34-44]   | 1094.12            | F.QSGGNNSPAVY.L                       |        | ✓           |              |                   |
| [44-58]   | 1799.92            | V.YLLDGLRAQDDYNGW.D                   |        | ✓           |              |                   |
| [45-55]   | 1279.38            | Y.LLDGLRAQDDY.N                       |        | ✓           | ✓            |                   |
| [45-58]   | 1636.75            | Y.LLDGLRAQDDYNGW.D                    | ✓      | ✓           | ✓            | ✓                 |
| [46-58]   | 1523.59            | L.LDGLRAQDDYNGW.D                     | ✓      | ✓           | ✓            | ✓                 |
| [45-68]   | 2874.07            | Y.LLDGLRAQDDYNGWDINTPAFEWY.Y          |        |             | ✓            |                   |
| [46-65]   | 2282.41            | L.LDGLRAQDDYNGWDINTPAF.E              |        |             | ✓            |                   |
| [47-58]   | 1410.43            | L.DGLRAQDDYNGW.D                      |        |             | ✓            |                   |
| [50-58]   | 1125.13            | L.RAQDDYNGW.D                         |        | ✓           | ✓            |                   |
| [56-68]   | 1613.71            | Y.NGWDINTPAFEWY.Y                     |        |             | ✓            |                   |
| [58-68]   | 1256.35            | W.DINTPAFEWY.Y                        |        |             |              | ✓                 |
| [59-67]   | 1093.17            | W.DINTPAFEWY.Y                        | ✓      | ✓           | ✓            | ✓                 |
| [59-68]   | 1256.35            | W.DINTPAFEWY.Y                        | ✓      | ✓           | ✓            |                   |
| [59-73]   | 1804.94            | W.DINTPAFEWYYQSGL.S                   |        |             | ✓            |                   |
| [68-86]   | 2084.34            | W.YYQSGLSIVMPVGGQSSFY.S               |        |             | ✓            |                   |
| [69-85]   | 1757.99            | Y.YQSGLSIVMPVGGQSSF.Y                 |        |             | ✓            | ✓                 |
| [69-86]   | 1921.16            | Y.YQSGLSIVMPVGGQSSFY.S                |        |             | ✓            | ✓                 |
| [74-85]   | 1209.40            | L.SIVMPVGGQSSF.Y                      |        | ✓           |              |                   |
| [74-86]   | 1372.57            | L.SIVMPVGGQSSFY.S                     | ✓      | ✓           | ✓            | ✓                 |
| [74-90]   | 1924.12            | L.SIVMPVGGQSSFYSDWY.S                 |        |             | ✓            |                   |
| [78-86]   | 942.01             | M.PVGGQSSFY.S                         |        |             | ✓            | ✓                 |
| [86-102]  | 1901.07            | F.YSDWYSPACGKAGCQTY.K                 |        |             | ✓            |                   |
| [87-102]  | 1737.90            | Y.SDWYSPACGKAGCQTY.K                  | ✓      | ✓           | ✓            | ✓                 |
| [90-102]  | 1349.52            | W.YSPACGKAGCQTY.K                     |        |             | ✓            |                   |
| [91-102]  | 1186.35            | Y.SPACGKAGCQTY.K                      |        | ✓           | ✓            |                   |
| [92-102]  | 1099.27            | S.PACGKAGCQTY.K                       |        |             | ✓            |                   |
| [103-107] | 710.80             | Y.KWETF.L                             |        | ✓           |              | ✓                 |
| [103-115] | 1665.87            | Y.KWETF.LTSELQWL.L                    |        |             | ✓            |                   |
| [103-116] | 1779.03            | Y.KWETF.LTSELQWL.S                    | ✓      |             | ✓            | ✓                 |
| [104-107] | 710.80             | Y.KWETF.L                             | ✓      |             |              |                   |
| [108-116] | 1087.25            | F.LTSELQWL.S                          | ✓      | ✓           |              |                   |
| [117-132] | 1513.73            | L.SANRAVKPTGSAAIL.S                   | ✓      | ✓           | ✓            | ✓                 |
| [120-130] | 1071.26            | N.RAVKPTGSAAIL.G                      |        | ✓           |              |                   |
| [120-132] | 1241.47            | N.RAVKPTGSAAIL.S                      | ✓      | ✓           | ✓            | ✓                 |
| [121-132] | 1085.28            | R.AVKPTGSAAIL.S                       |        | ✓           |              |                   |
| [122-132] | 1014.20            | A.VKPTGSAAIL.S                        |        | ✓           |              |                   |
| [141-150] | 1188.36            | M.ILAAAYHPQQF.I                       | ✓      |             | ✓            | ✓                 |
| [143-150] | 962.04             | L.AAYHPQQF.I                          | ✓      | ✓           | ✓            | ✓                 |
| [151-156] | 623.72             | F.IYAGSL.S                            |        | ✓           |              |                   |
| [151-173] | 2261.62            | F.IYAGSLSALLDPSQGMGPSLIGL.A           |        |             | ✓            | ✓                 |
| [151-181] | 2984.40            | F.IYAGSLSALLDPSQGMGPSLIGLAMGDAGGY.K   |        |             | ✓            |                   |
| [153-173] | 1985.29            | Y.AGSL.SALLDPSQGMGPSLIGL.A            |        |             | ✓            | ✓                 |
| [153-181] | 2708.06            | Y.AGSL.SALLDPSQGMGPSLIGLAMGDAGGY.K    |        |             | ✓            |                   |
| [153-184] | 2978.39            | Y.AGSL.SALLDPSQGMGPSLIGLAMGDAGGYKAA.D |        |             | ✓            |                   |

|           |         |                                           |   |   |   |   |
|-----------|---------|-------------------------------------------|---|---|---|---|
| [157-173] | 1656.93 | L.SALLDPSQGMGPSLIGL.A                     | ✓ | ✓ | ✓ | ✓ |
| [157-181] | 2379.70 | L.SALLDPSQGMGPSLIGLAMGDAGGY.K             |   |   | ✓ | ✓ |
| [158-173] | 1569.85 | S.ALLDPSQGMGPSLIGL.A                      |   | ✓ |   |   |
| [160-173] | 1385.61 | L.LDPSQGMGPSLIGL.A                        | ✓ | ✓ |   |   |
| [160-181] | 2108.38 | L.LDPSQGMGPSLIGLAMGDAGGY.K                |   |   | ✓ |   |
| [161-173] | 1272.45 | L.DPSQGMGPSLIGL.A                         |   | ✓ |   |   |
| [161-181] | 1995.22 | L.DPSQGMGPSLIGLAMGDAGGY.K                 |   |   |   |   |
| [182-187] | 721.85  | Y.KAADMW.G                                | ✓ | ✓ |   |   |
| [182-206] | 2827.08 | Y.KAADMWGPSSDPAWERNDPTQQIPK.L             | ✓ | ✓ | ✓ | ✓ |
| [182-207] | 2940.24 | Y.KAADMWGPSSDPAWERNDPTQQIPK.L.V           | ✓ | ✓ |   | ✓ |
| [182-210] | 3224.55 | Y.KAADMWGPSSDPAWERNDPTQQIPKLVAN.N         | ✓ |   | ✓ |   |
| [182-211] | 3338.66 | Y.KAADMWGPSSDPAWERNDPTQQIPKLVANN.T        | ✓ |   |   | ✓ |
| [182-212] | 3439.76 | Y.KAADMWGPSSDPAWERNDPTQQIPKLVANN.T.R      | ✓ |   | ✓ | ✓ |
| [182-215] | 3895.32 | Y.KAADMWGPSSDPAWERNDPTQQIPKLVANN.T.RL.W.V |   |   | ✓ | ✓ |
| [188-206] | 2124.26 | W.GPSSDPAWERNDPTQQIPK.L                   | ✓ | ✓ |   |   |
| [188-207] | 2237.42 | W.GPSSDPAWERNDPTQQIPK.L.V                 | ✓ | ✓ |   |   |
| [188-208] | 2336.55 | W.GPSSDPAWERNDPTQQIPK.L.V.A               | ✓ | ✓ |   |   |
| [188-210] | 2521.73 | W.GPSSDPAWERNDPTQQIPKLVAN.N               | ✓ | ✓ |   |   |
| [188-211] | 2635.83 | W.GPSSDPAWERNDPTQQIPKLVANN.T              | ✓ | ✓ |   |   |
| [188-212] | 2736.94 | W.GPSSDPAWERNDPTQQIPKLVANN.T.R            | ✓ | ✓ |   | ✓ |
| [188-215] | 3192.49 | W.GPSSDPAWERNDPTQQIPKLVANN.T.RL.W.V       | ✓ |   | ✓ | ✓ |
| [196-206] | 1326.44 | W.ERNPTQQIPK.L                            |   | ✓ |   |   |
| [196-215] | 2394.68 | W.ERNPTQQIPKLVANN.T.RL.W.V                |   |   | ✓ | ✓ |
| [207-212] | 631.70  | K.LVANNT.R                                |   | ✓ |   |   |
| [207-215] | 1087.26 | K.LVANNT.RL.W.V                           | ✓ |   | ✓ |   |
| [216-235] | 2024.20 | W.VYCGNGTPNELGGANIPAEF.L                  |   |   | ✓ |   |
| [216-239] | 2527.75 | W.VYCGNGTPNELGGANIPAEFLENF.V              |   |   | ✓ |   |
| [216-245] | 3184.49 | W.VYCGNGTPNELGGANIPAEFLENFVRRSSNL.K       |   |   | ✓ |   |
| [218-235] | 1761.90 | Y.CGNGTPNELGGANIPAEF.L                    |   |   | ✓ |   |
| [218-239] | 2265.45 | Y.CGNGTPNELGGANIPAEFLENF.V                |   |   | ✓ |   |
| [236-245] | 1179.31 | F.LENFVRRSSNL.K                           | ✓ |   | ✓ | ✓ |
| [238-245] | 937.04  | E.NFVRRSSNL.K                             | ✓ |   |   |   |
| [246-251] | 771.84  | L.KFQDAY.N                                |   | ✓ |   |   |
| [246-261] | 1710.83 | L.KFQDAYNAAGGHNAVF.N                      | ✓ |   | ✓ | ✓ |
| [252-261] | 958.01  | Y.NAAGGHNAVF.N                            | ✓ | ✓ | ✓ | ✓ |
| [262-274] | 1635.72 | F.NFPPNGTHSWEYW.G                         |   |   | ✓ |   |
| [264-271] | 895.94  | F.PPNGTHSW.E                              | ✓ |   | ✓ |   |
| [272-278] | 866.94  | W.EYWGAQL.N                               | ✓ |   | ✓ |   |
| [275-289] | 1561.75 | W.GAQLNAMRGDLQSSL.G                       |   |   | ✓ |   |
| [275-292] | 1746.93 | W.GAQLNAMRGDLQSSLGAG.-                    |   |   | ✓ | ✓ |
| [279-289] | 1192.33 | L.NAMRGDLQSSL.G                           |   |   | ✓ | ✓ |
| [279-291] | 1164.32 | L.NAMKGDQSSL.G                            |   | ✓ |   |   |
| [279-292] | 1349.50 | L.NAMKGDQSSLGAG.-                         | ✓ | ✓ |   |   |
| [279-292] | 1377.51 | L.NAMRGDLQSSLGAG.-                        |   |   | ✓ | ✓ |
| [280-291] | 1050.21 | N.AMKGDQSSL.G                             |   | ✓ |   |   |
| [280-292] | 1235.39 | N.AMKGDQSSLGAG.-                          | ✓ | ✓ |   |   |
| [280-292] | 1263.41 | N.AMRGDLQSSLGAG.-                         |   |   | ✓ | ✓ |
| [282-292] | 1033.12 | M.KGDQSSLGAG.-                            |   | ✓ |   |   |

RT: 0.00 - 35.00 SM: 15G

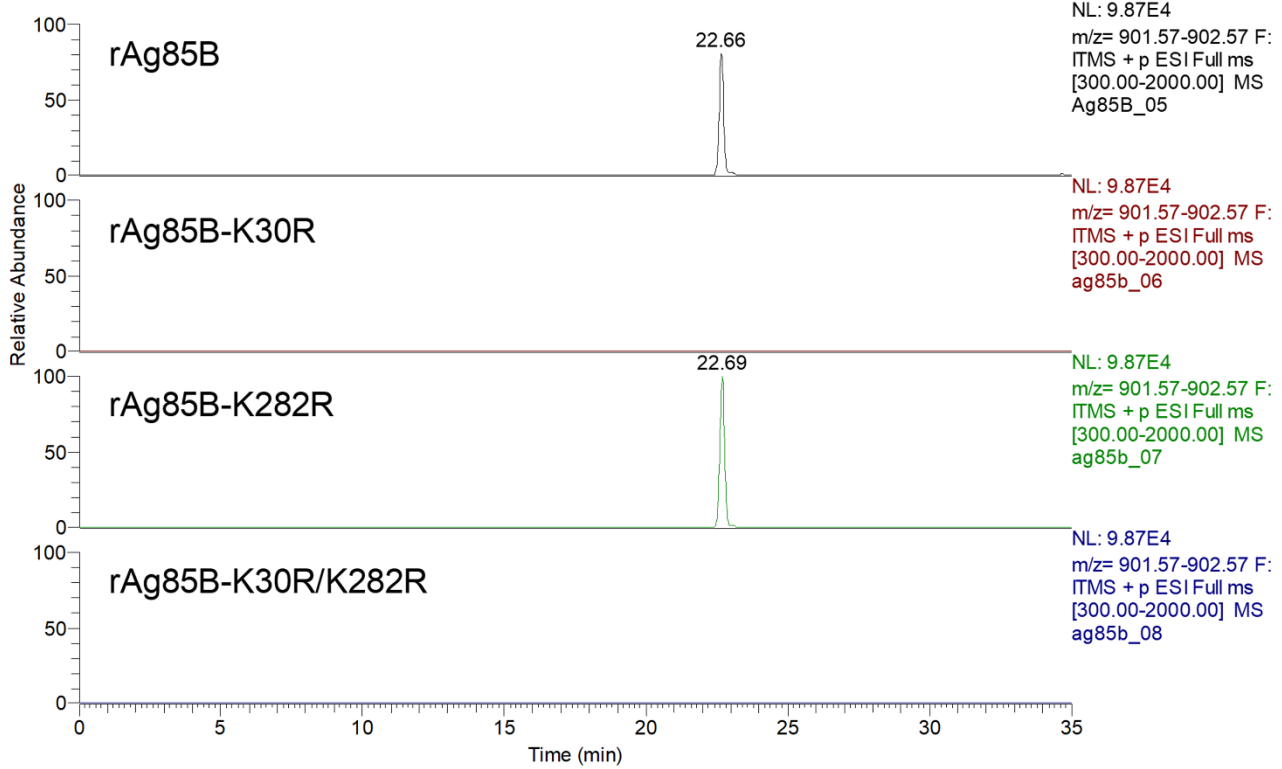

Fig. S2 EIC for m/z 902.07 Da (z=2) corresponding to peptide 18-33 comprising K30.

RT: 0.00 - 35.00 SM: 15G

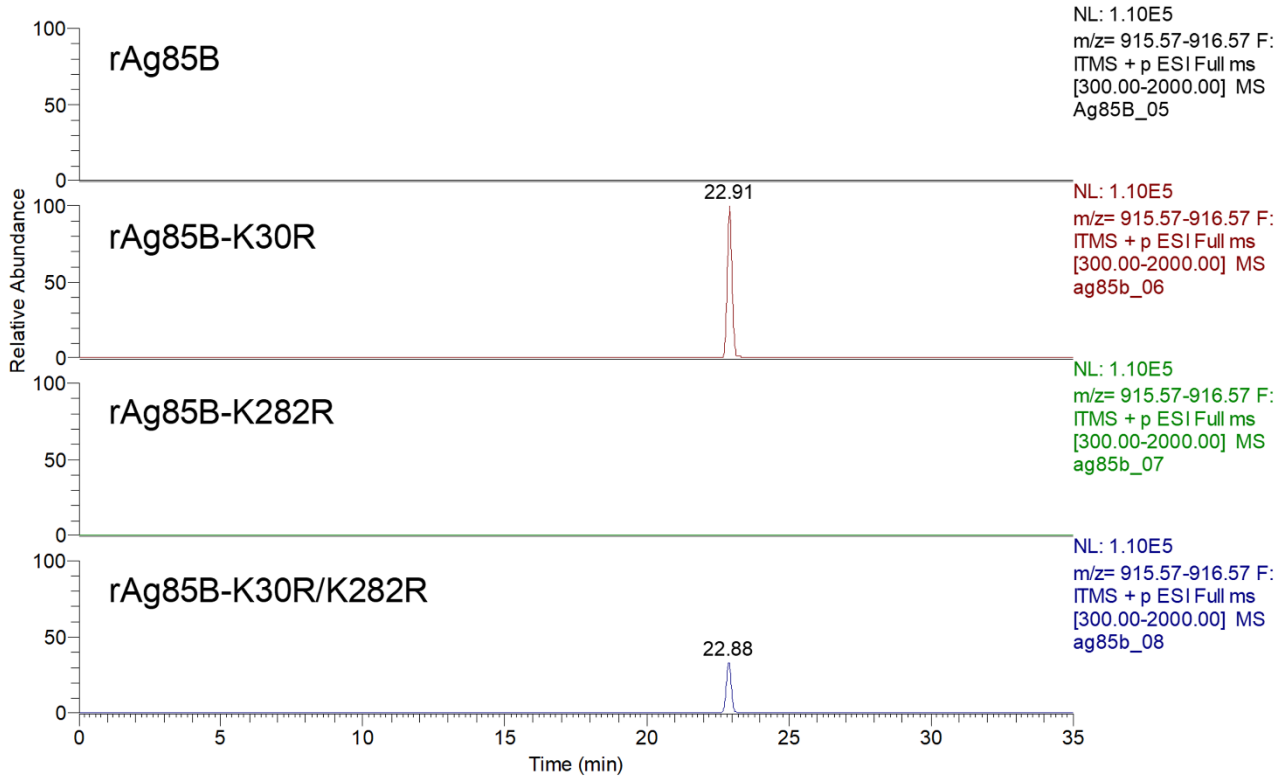

Fig. S3 EIC for m/z 916.07 Da (z=2) corresponding to peptide 18-33 comprising R30.

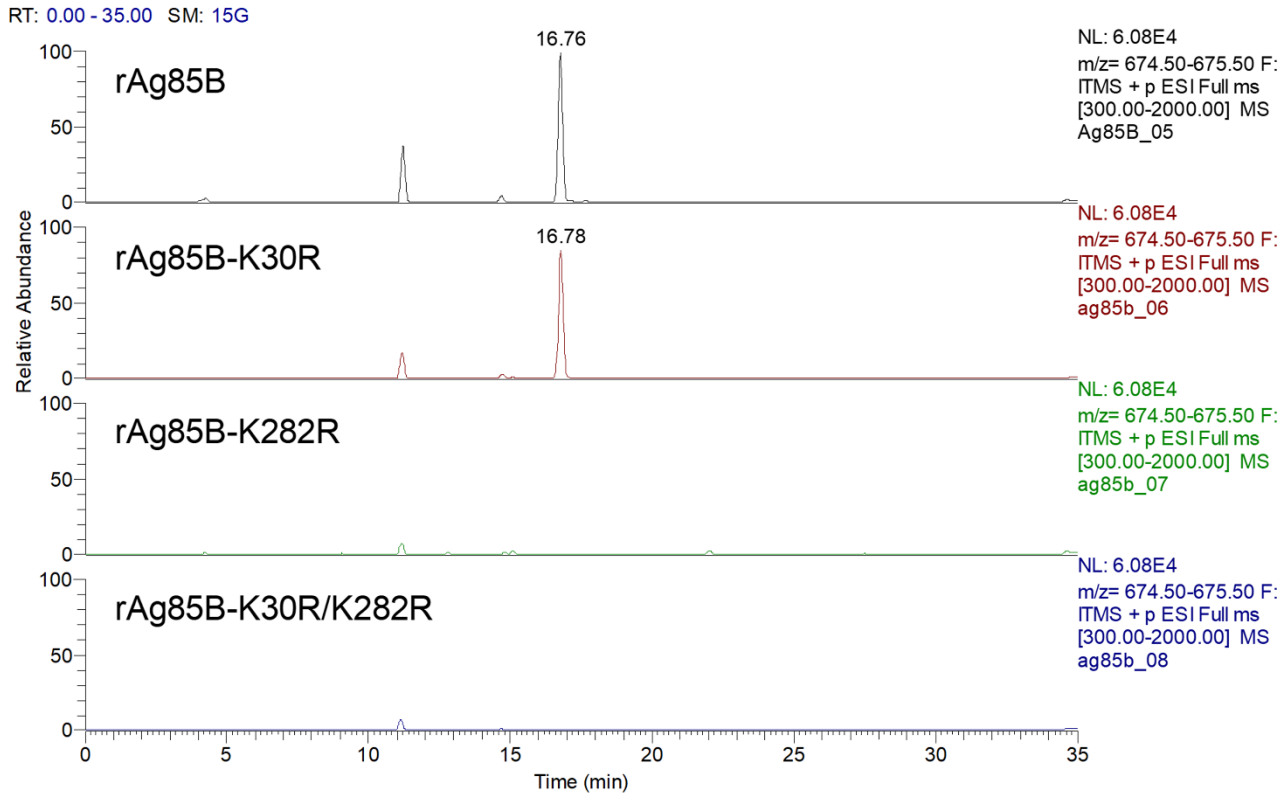

**Fig. S4** EIC for  $m/z$  675.00 Da ( $z=2$ ) corresponding to peptide 279-292 comprising K282.

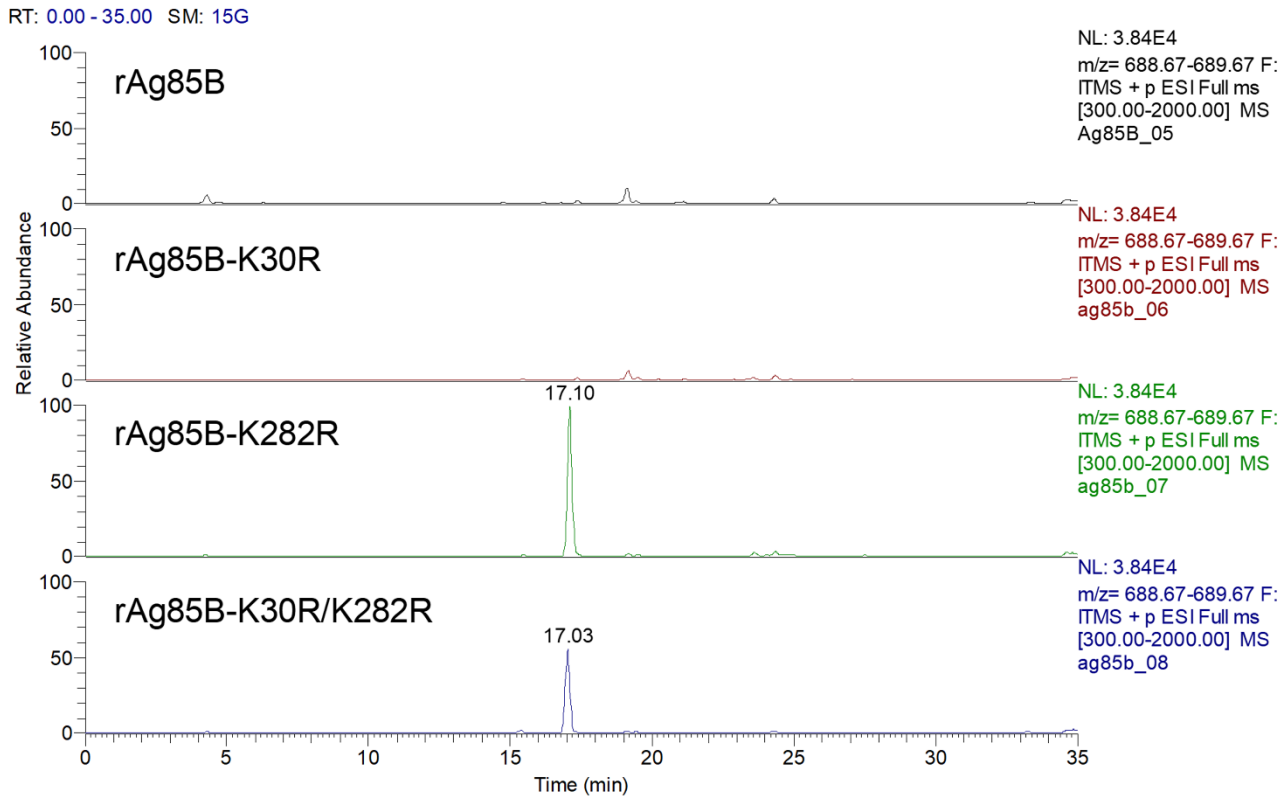

**Fig. S5** EIC for  $m/z$  689.17 Da ( $z=2$ ) corresponding to peptide 279-292 comprising R282.

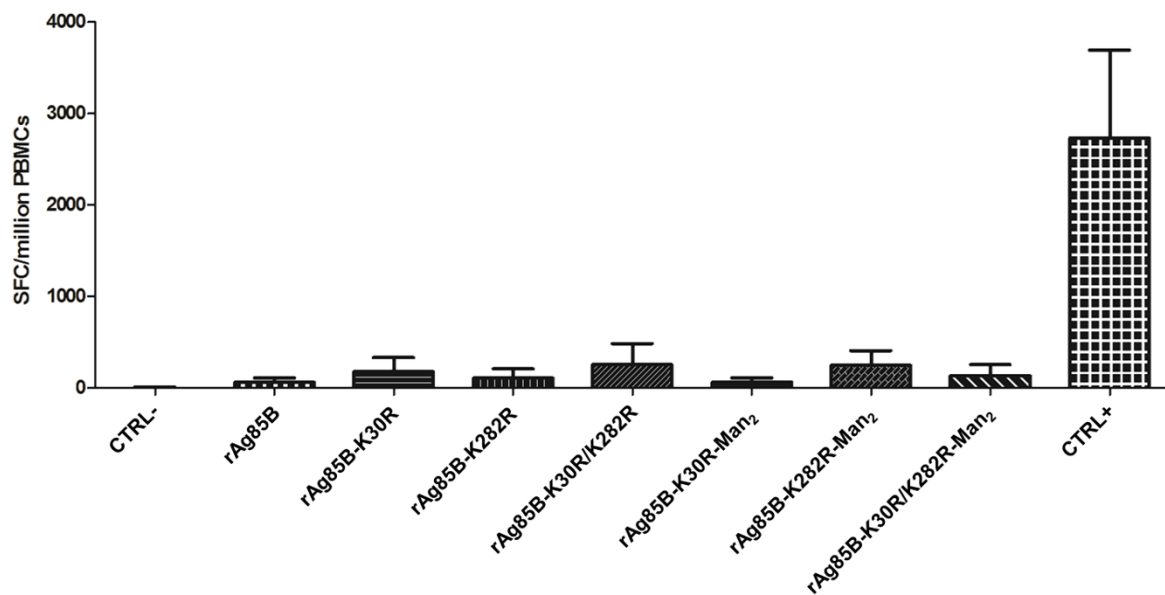

**Fig. S6** T-cell responses to rAg85B and glycoconjugated rAg85B antigens. Data are presented as mean±standard deviation of the SFC per million PBMCs obtained by ELISPOT in non-BCG-vaccinated subjects. PBMC were stimulated with (CTRL+) or without (CTRL-) phytohemagglutinin.

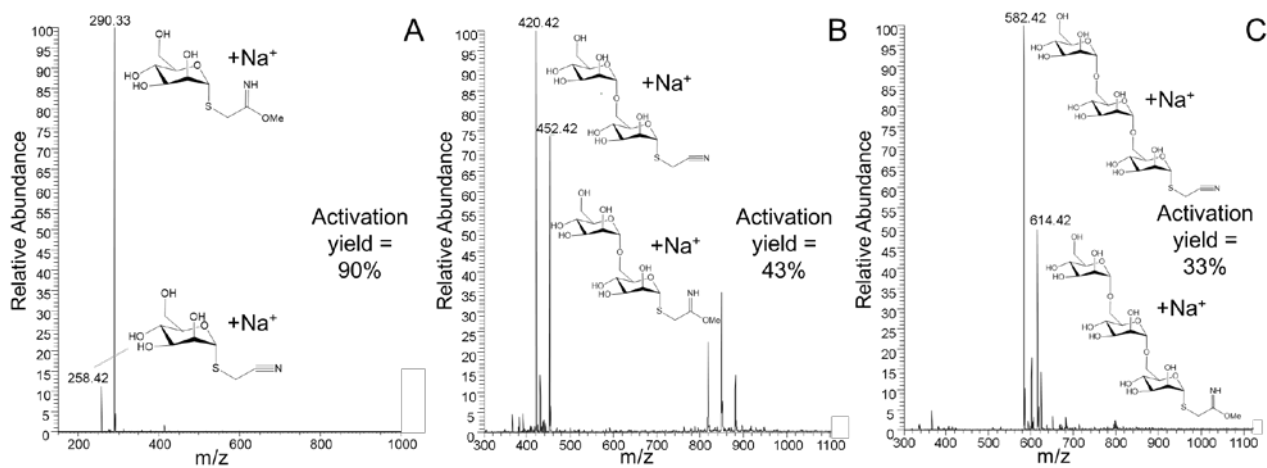

**Fig. S7** ESI-MS spectra of Man-IME (A), Man<sub>2</sub>-IME (B) and Man<sub>3</sub>-IME (C) glycosides employed in this study.

**Table S2** Glycoform distribution (relative abundance %), glycosylation yield (%) and glycoside/protein ratio (mol mol<sup>-1</sup>) calculated for glycoconjugates assayed by ELISPOT.

| Glycoconjugate                     | Number of incorporated glycosides (%) |      |      |      |      |      |   |   |   | Y (%) | Glycoside/protein<br>(mol mol <sup>-1</sup> ) |
|------------------------------------|---------------------------------------|------|------|------|------|------|---|---|---|-------|-----------------------------------------------|
|                                    | 0                                     | 1    | 2    | 3    | 4    | 5    | 6 | 7 | 8 |       |                                               |
| rAg85B-K30R-Man <sub>2</sub>       | -                                     | 9.6  | 20.4 | 30.0 | 25.2 | 14.8 | - | - | - | 100.0 | 3.1                                           |
| rAg85B-K282R-Man <sub>2</sub>      | -                                     | 9.2  | 18.0 | 28.7 | 28.4 | 15.7 | - | - | - | 100.0 | 3.2                                           |
| rAg85B-K30R/K282R-Man <sub>2</sub> | 8.5                                   | 25.5 | 32.8 | 22.3 | 11.0 | -    | - | - | - | 91.5  | 2.0                                           |
